# Supplementary material
Source: Springer Nature journal article supplement (https://www.springermedizin.de/resource/supplementary/12936_2005_143_MOESM2_ESM.pdf/9546974)
Supplement: MOESM2 [file 9546974]

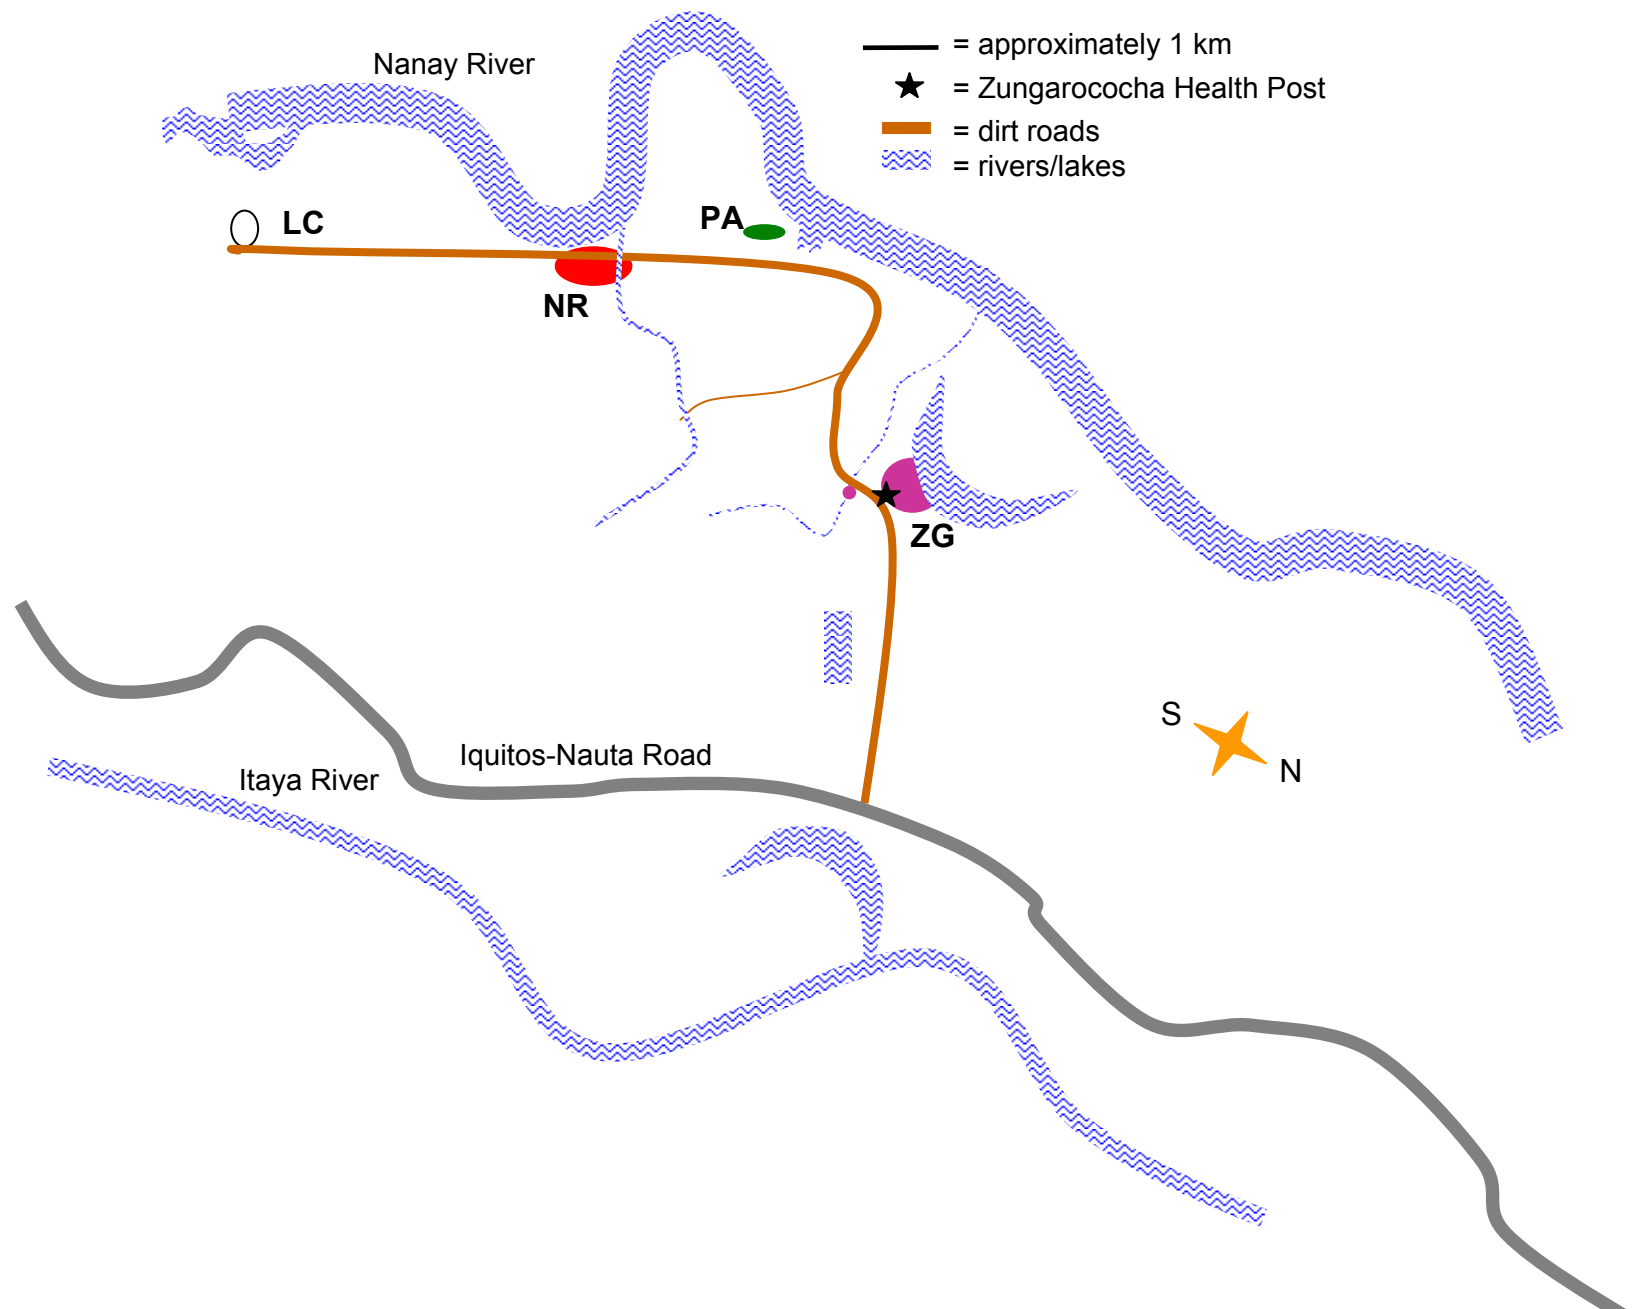

Nanay River

— = approximately 1 km

★ = Zungarococha Health Post

— = dirt roads

— = rivers/lakes

○ LC

PA

NR

ZG

Iquitos-Nauta Road

Itaya River

S

N
